# Fractal model of emergence of a proto-plant

V.V. Galitskii

Institute of Physical-Chemical and Biological Problems of Soil Science RAS  
Pushchino, Moscow region, Russia

**ABSTRACT** Sectional model of the tree's system branches, which was published earlier, was extended in the range (0,1) for model's allometric parameter  $\mu$ , binding magnitude of the green biomass of a tree and its size (for spruce  $\mu \approx 1.83$ ). The model has shown presence of a biomass of branches in this range that indicates, according to fractal geometry, on the placement of a green biomass in the form of set of "points". In turn according to contemporary notions about endosymbiotic character of appearance of organelles in eukaryotic cell this was interpreted as begin of endosymbiosis of cyanobacteria and a host (protist) and has been modeled by the groups placement of growing number of points on an interval under initial limitation the number of points per group. The limitation is connected to the initial absence in protist an infrastructure which is need for the growing number of cyanobacteria. It has been demonstrated that initially in course of increasing total number of points the parameter  $\mu$  decreases from 1.0 to 0.25 under the fixed number of points per group and then increases to 1.0 under the fixed number of groups. This gives an initial deceleration of growth of proto-plant's size (a characteristic geometrical size of the point set) and then the exponential growth after deliverance from limitation of point number per group in course of host evolution. Similar initial deceleration of growth can be seen now also in higher plants. Morphological analogy of situations of beginning the plant embryogenesis and of seed germination with the situation described by the model of proto-plant appearance is discussed.

**Keywords:** sectional model of a tree, fractal parameter, set of photosynthetic points, group placement, endosymbiosis, trajectory of evolution, proto-plant, initial deceleration of growth.

## INTRODUCTION

In [1] has been allocated the sectional tree structure with periodic growth, which can be described by a simple model of the dynamics biomass of section using the notion of co-axial adjacent virtual trees, nested each to other and periodically appearing on the top of the tree. Biomass of each next virtual tree is part of previous one and accordingly, the biomass of each section consisting of biomasses of its branches, may be calculated as the difference between biomasses the two adjacent virtual trees. Considering the dynamics of real tree biomass known and taking it for the virtual tree as

32 an initial approximation, we can thus obtain the dynamics of biomass distribution along sections (and  
33 height) of the real tree [1]. When using assumption about the monotony and limited dynamics of the  
34 green biomass of a tree this model has demonstrated some of the properties of a tree existing in reality.  
35 The model showed also the possibility by varying the three parameters to obtain the biomass  
36 distributions in height (sections) of the tree that may be associated with a rather distant from each other  
37 tree species [2]. This model has been used as a basis for analyzing the dynamics of distribution and  
38 distant transport of assimilates along the freely growing tree using "diffusion" formulation of transport  
39 mechanism of mass-flow. The model of distant transport has shown the possibility of the so-called "a  
40 respiratory barrier" associated with the power-law dependence of costs on the breath on the magnitude  
41 of biomass, as well as the effect of the stratification of the tree by interleaving groups of the donor and  
42 acceptor sections [3]. Combination of sectional model and the two-dimensional model of biomass  
43 dynamics of a tree growing not freely [4] has demonstrated that the lower sections of a tree growing in  
44 a limited area (polygon) in the community are in oppression and die (more rapidly in comparison with  
45 the freely growing tree). As a result, at the top of the tree new sections appear and they are growing  
46 freely, and the bottom sections die, i.e. occurs wave of biomass that moves up along the tree stem [5].

47 In [6] the sectional tree model was extended to the branches system that carry green biomass of  
48 respective sections of tree. Parametrizing model of branches system using nature data [7] about  
49 lifespan  $t_{D,j}$  of spruce branches of four orders ( $j = 1, \dots, 4$ ) showed that in this case model of system of  
50 regular branches must also take into consideration two known features of spruce – initial growth  
51 deceleration [8] and existence and role of inter-verticil branches [9, 10]. The combined model is in  
52 good agreement with natural data and with other publications. Model only regular branches showed  
53 only the branches of the 1st order, and when it is complemented by sub-model of the initial  
54 deceleration of growth it shows the branches of all 4 orders [6, fig. 2b, d]. This article discusses some  
55 of the consequences of interpretation of the allometric parameter  $\mu$  linking green biomass  $B$  and  
56 geometric size  $H$  of a tree

$$57 \quad B \sim H^\mu \quad (1)$$

58 as a fractal parameter, and dissemination of model to the range  $\mu (0, 1)$ . For spruce the value of  
59 parameter was obtained  $\mu \approx 1.83$  [6]. It lies in the range  $[1, 2)$  corresponding to a set of linear elements  
60 (conifer needles) [11].

61 Figure 1 shows dependence  $t_{D,j}(\mu)$  of lifespan for system of the  $j$ -orders branches. It shows features  
62 of the model system of regular branches, which was augmented by the sub-model of initial growth  
63 deceleration for the range of fractal parameter  $\mu (0, 1)$  with the set of other parameters of spruce from  
64 [7, 12]. This range according to the ideas of fractal geometry [11] corresponds to the set of points. In

65 this range of  $\mu$  there are the branches of first 3 orders, i.e. biomass is placed along height of "tree" in  
 66 the form of green "dots" what is not observed visually in the higher plants. The article [12]  
 67 demonstrated that the appearance of branches of orders  $j = 1, 2$  and 3 in this range of  $\mu$  is a  
 68 consequence of accounting initial deceleration in growth model.

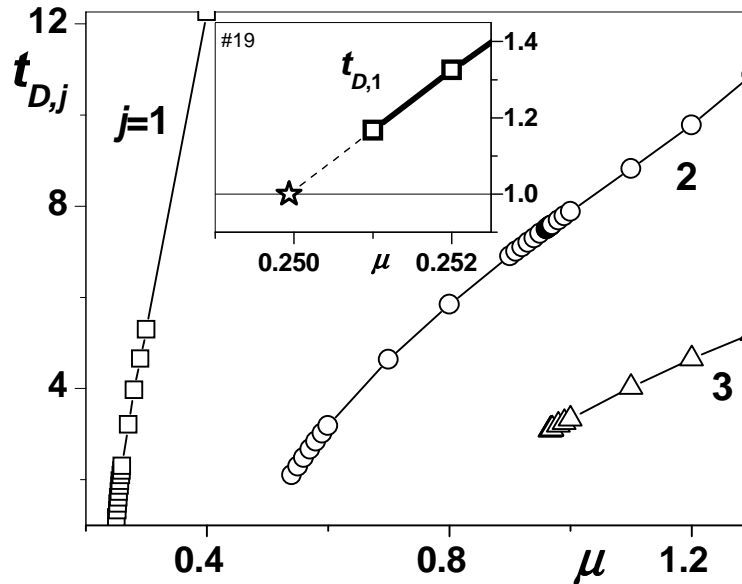

69  
 70 Fig. 1. The dependence of the lifetime of the  $j$ -branches  $t_{D,j}$  of regular branches' model with adding of the sub-model  
 71 of initial growth deceleration [6]; other parameters are as for spruce [6, 7]. Inset for the 1-branch in a larger scale, an  
 72 asterisk  $\square$  the appearance of the 1-branch for parameter set  $\mu\#19$  [6].

### 73 ON THE FRACTAL PROPERTIES OF SETS OF POINTS ON THE INTERVAL

74 The mechanisms of photosynthesis of higher plants and cyanobacteria are practically identical. This  
 75 is due to the history of the appearance of plants in symbiosis and / or endosymbiosis of cyanobacteria  
 76 and protists. According to [13-15], chloroplasts of modern plants are the descendants of the  
 77 cyanobacteria which undergone transformation in the course of evolution after the organization of  
 78 endosymbiosis with protists. Thus, photosynthesis in plants and is now being performed by "point"  
 79 elements (chloroplasts), placed in the cells of green biomass of plants [15, 16]. Features of placing a  
 80 set of points in space affect the value of a fractal parameter and thus the efficiency of using of sunlight  
 81 in the plant growth. It should be noted that a tree and set of points are natural objects of the fractal  
 82 geometry, which allows using its methods directly [11].

83 Assuming that the initial invasions of cyanobacteria into the cell of endosymbiosis' host were  
 84 sporadic and have not lead directly to a compact placement and considering that protists are by several  
 85 orders bigger than cyanobacteria, we can estimate the parameter  $\mu$  for the set of  $N_p$  points in an interval  
 86 using the usual algorithm of box counting [11]. Placing points of a set not in the groups of points on an

87 interval but with uniform random placement or with placement with fixed step leads to  $\mu \approx 1.0$ .  
88 Placement in groups of points on the interval gives  $\mu < 1$ . It can be noticed that Cantor point sets,  
89 which often considered as a simple example [11], are actually group placements with  $\mu < 1$ .

90 For group placements of points on the interval [12]: 1) the value  $\mu$  is practically independent of  $A$  –  
91 relative value of on-off space ratio for stepper placement of groups; 2)  $\mu$  depends on type of the  
92 placement of points in the groups; 3) for stepper placement of groups the value  $\mu$  quite resistant to  
93 accidental and rather large deviations of groups' location.

#### 94 **FRACTAL TRAJECTORIES OF PROTO-PLANT EVOLUTION**

95 Endosymbiosis is cohabitation of protist and cyanobacteria within it, as a natural development of  
96 their symbiosis during the trophic relations between "heterotrophic protists" and "photosynthetic  
97 prokaryotes" [13: 25]. Thus cyanobacteria, being in the capsule, the inner wall of which has the same  
98 properties as the outer wall of the host, appeared in natural conditions close to them in symbiosis and  
99 in result continued normal existence in endosymbiosis [17]. Endosymbiosis begins with a minimal  
100 number of cyanobacteria inside the host –  $N_p = N_g * n_g$  and in groups –  $n_g$  ( $N_g$  is the number of groups).  
101 This is determined by the initial lack in host of a necessary system for supplying cyanobacteria and  
102 distribution of their products (i.e. an infrastructure). The number of groups  $N_g$ , seems less critical,  
103 since supplying them in this case is local and may be carried out at symbiotic level. During evolution  
104 of endosymbiosis, the number of groups  $N_g$  containing 1 and / or 2 dots at first should increase and  
105 then upon reaching a certain level of supplying (appearing infrastructure) quantity  $n_g$  of  
106 cyanobacteria per group may start to increase. Fig. 2 shows the dependence of  $\mu(N_g)$  (empty  
107 symbols) for some fixed values of  $n_g$ . The parameter  $\mu$  decreases from 1 to  $\approx 0.25$  with the growing  
108 number (from 1) of groups  $N_g$  and a minimum fixed number ( $n_g = 2$ ) of points per group. The same  
109 figure shows the dependence of  $\mu(n_g)$  with increasing  $n_g$  for several fixed values  $N_g$  (black symbols).  
110 The parameter  $\mu$  increases weakly with the number of points in the group  $n_g$  at a small fixed number  
111 of groups  $N_g$  ( $\geq 2$ ). When  $N_g$  value is large then the parameter  $\mu$  increases at first rapidly with  $n_g$  and  
112 then slowly, remaining slightly less than 1. The abscissa in Fig. 2 shows the evolutionary "time"  $T_2$  as  
113 the total number of doublings corresponding active (not fixed) variable –  $N_g$  or  $n_g$  (chloroplasts  
114 reproduce by dividing in half).

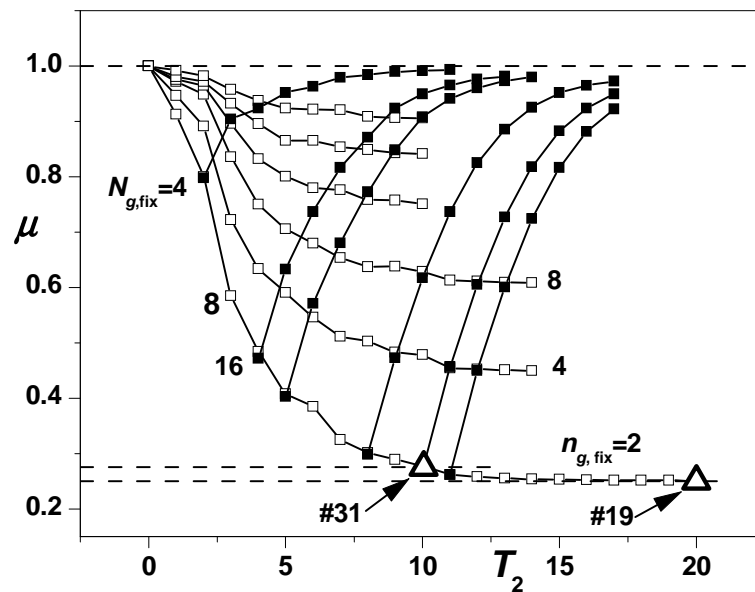

115

116 Fig. 2. Two-dimensional images of three-dimensional trajectories of dependencies  $\mu(N_g, n_g)$ . Examples of combined  
 117 trajectories: part  $n_{g,fix}$  at a fixed value  $n_g$  (empty squares) and part  $N_{g,fix}$  at a fixed  $N_g$  (filled squares),  $A = 0.005$ .  
 118 Empty triangles -  $\mu_{\#19}$  and  $\mu_{\#31}$  correspond to nature data [7] and their model interpretations [6] (see inset in Figure  
 119 1, #19).

120 Consider the possible trajectories of the endosymbiotic proto-plants in space  $(\mu, N_g, n_g)$ . It is evident  
 121 that the proto-plant begins as a series of infestations by solitary cyanobacterium into the host's body in  
 122 random places of an interval. Since the reproduction of it is not possible, then  $\mu = 1$  regardless of the  
 123 number of points. When cyanobacterium gain an opportunity of dividing with the restriction  $n_g \leq 2$ ,  
 124 and is removed the restriction (if it was) on the number of groups  $N_g$ , evolution begins on a trajectory  
 125  $n_{g,fix} = 2$  (Fig. 2) going with decreasing to  $\mu \approx 0.25$ . When at some moment  $T_2$  immediately or gradually  
 126 in the course of evolution is removed the restriction of division cyanobacteria in groups, the evolution  
 127 of proto-plant goes over to the appropriate trajectory  $N_{g,fix}$  (Fig. 2), which leads to an increase in  
 128 magnitude of  $\mu$  to the value of 1. When fractal parameter  $\mu$  reaches 1 the situation is already  
 129 corresponds to the sets of linear elements, i.e., the piecewise linear or continuous filling of interval  
 130 (considering the real size of the green "point"). This assembly procedure is shown in Fig. 2 for  
 131 multiple combinations of fixed values  $n_{g,fix}$  and  $N_{g,fix}$ . Thus, during the evolution of proto-plant the  
 132 dependence  $\mu(T_2)$  of the fractal parameter must go out from the 1, to pass through a minimum and then  
 133 again tends to the value 1. In this picture, obviously, profound detalization is possible, depending on  
 134 symbiotic "experience" of protist and cyanobacteria – for example, trajectory could start with  $n_{g,fix} = 4$ ,  
 135 as shown in Fig. 2, or depending on value  $N_g$  of host, at which the trajectory type is changed, but it  
 136 does not change the nature of the trajectory of the proto-plant. It may be noted that it follows from this  
 137 the countability of set of variants of this evolution, which led every the proto-plant into state of a plant

138 with  $\mu = 1$  in different evolutionary times  $T_2$  and, consequently, could give different previous and / or  
 139 subsequent histories of plant evolution. In Fig. 2 positions at the trajectory  $n_{g,fix} = 2$ , corresponding to  
 140 the values  $\mu$  (#19 and #31) received for the two sets of natural values of  $t_{D,j}$  for spruce [7], are marked  
 141 by asterisks. It is evident that a proto-spruce (# 19) spent on the evolution approximately twice as  
 142 much "time" than of the proto-spruce (# 31), and this was reflected in their "descendants" [6, fig. 5].

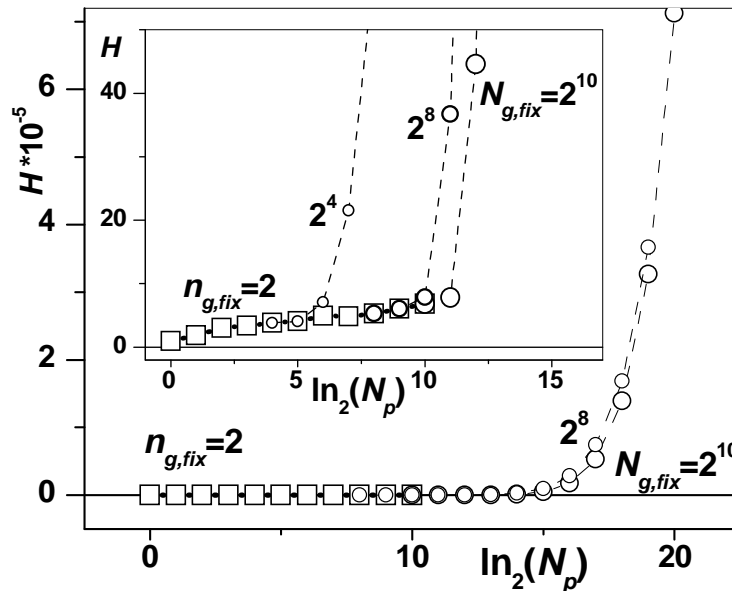

143  
 144 Fig. 3. The initial deceleration of the proto-plant growth during endosymbiosis. The dynamics of the size  $H \sim B^{1/\mu}$  of  
 145 system of green "points" corresponds to an increase in their biomass (population, unit of biomass – a mass of  
 146 cyanobacterium). Inset: movement along trajectories  $\mu(n_{g,fix}, N_{g,fix})$  with an increase in the number of groups of  $N_g$  in  
 147 the first portion, where the number of  $n_{g,fix}$  points in the group (the squares) is fixed, and in the second portion  $N_{g,fix}$   
 148 (circles, dashed) – increasing total  $N_p = N_g * n_g$  by way doubling the number of "points"  $n_g$  in groups with using the  
 149 combined dynamics of the fractal parameter  $\mu(T_2)$  (see Figure 2.)

## 150 INITIAL GROWTH DECELERATION OF PROTO-PLANT

151 As seen from the foregoing, green biomass (i.e., the number of cyanobacteria involved in  
 152 endosymbiosis) is the leading variable in the evolution of proto-plant. Therefore, "turning over" the  
 153 ratio (1) and using the obtained dependence  $\mu(T_2)$ , we can calculate dynamics of the characteristic size  
 154  $H$  of the system of points –  $H(T_2) \sim (N_g(T_2) * n_g(T_2))^{1/\mu(T_2)}$ . Fig. 3 shows examples of the dynamics of  
 155  $H(T_2)$  demonstrating a very weak growth at the stage  $n_{g,fix}$ , which is replaced by an exponential rise on  
 156 stage  $N_{g,fix}$ .

157

158

159

160 **DISCUSSION**

161 According to modern evolutionary theory (biogenetic law) "in embryonic development have  
162 sometimes can be reproduced stages of evolutionary history" [14], i.e., may be the so-called  
163 recapitulation, as which is usually understood a visually discernible similarity some stages of a modern  
164 organism in embryogenesis and ontogenesis of its evolutionary ancestors. In this sense apparently, the  
165 "punctiform recapitulations", which repeat visually sufficiently "strictly" the situation of occurrence of  
166 proto-plant (at the beginning of the range  $\mu < 1.0$  in Fig. 1), can be detected generally speaking in  
167 higher plants twice.

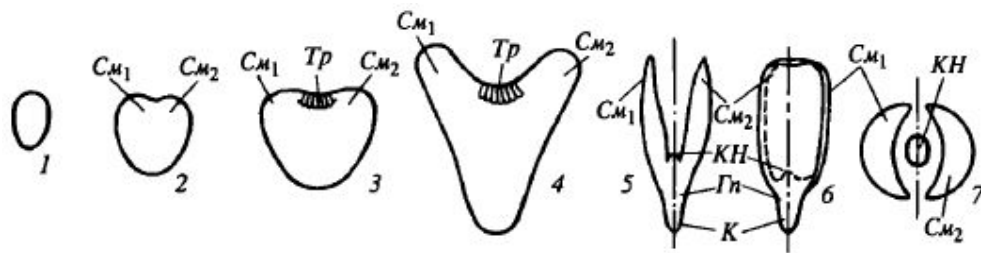

168  
169 Fig. 4. The scheme of development of dicotyledons embryos. 1-4 - the early development of the embryo; 5, 6 - fully  
170 formed embryo; view of two mutually perpendicular planes; 7 - a cross-section in the plumule embryos; CM1 and  
171 CM2 - cotyledons, TP - growth point (before forming cone of growth CN); Hp - hypocotyl; R - root. Dashed line  
172 shows the plane of symmetry (after [19: 144, Figure 70]).

173 The first time – in dicotyledons during embryogenesis when the seed embryo begins to turn green  
174 due to the transformation of the existing leucoplasts into the chloroplasts [18] in course of the  
175 transition from globular to heart phase of embryogenesis (Figure 4). [19]. The form (two cotyledons)  
176 of the embryo in a heart phase and placement of chlorophyll [20] may be associated with the  
177 appearance of "branches" of the first order in of proto-spruce (Fig. 1) with  $\mu \approx 0.25$ . Obviously, there is  
178 no complete coincidence and can not be. The matter is that the proto-plant appeared at initial absence  
179 of appropriate infrastructure and elements of the genome in the host, whereas a seed of higher plant in  
180 early embryogenesis it all in some form already has. According to the model, we can assume that the  
181 embryogenesis moves along a composit trajectory (of course, far more rapidly than a proto-plant has  
182 appeared), which is similar essentially to that shown in Fig. 3, taking into account the differences of  
183 their starting positions and structures. A distinctive feature of recapitulation, apparently, can be  
184 considered a group character of plastids placement with fixed number of  $n_{g,fix}$  in the group (Fig. 2,  
185 open squares) during the growth of the total number thereof on the globular phase of embryogenesis  
186 (Fig. 4 (1)) before and after the transition to the heart-shaped phase. The result of the plant  
187 embryogenesis is the appearance of typically yellow, mature dry seeds, which have no active

188 chlorophyll (chloroplasts when ripe are converted to colorless plastids – leucoplasts [18, 21]), and are  
189 able in this way to wait the appropriate conditions for germination.

190 The second time recapitulation can assume occurring during germination of mature dry, initially  
191 yellow seed of a plant when embryo with the formed cotyledons begins to turn green as a result of the  
192 transformation of existing colorless leucoplasts back in the green chloroplasts. Typically, this is a  
193 natural process of increasing the number of active chloroplasts which is expressed in normal ontogeny  
194 a plant. However for some economically important crops is observed, and it remains unclear [22] why  
195 the seeds, sometimes remaining green when ripe, i.e., during germination having an additional  
196 ("extra") chlorophyll, show poor germination, give low yields, and the poor quality of the product for  
197 oilseeds. If we assume that the situation at the beginning of seed germination and activation of  
198 "systemic" chlorophyll is reflected by the proto-plant model, then the role of "non-systemic" or excess  
199 chlorophyll become clear. It is obvious that the activation of chloroplast in the embryo, having the  
200 appropriate infrastructure is controlled by the genome. "Non-systemic" chloroplasts are not consistent  
201 with infrastructure of embryo, are located quite randomly and are generating extra, "non-systemic"  
202 oxygen that can damage cell structures [20, 23], i.e. adversely affect the process of germination and  
203 further ontogeny. In addition, not only the quantity but also the spatial distribution of the additional  
204 chloroplasts may be important as unacceptable for the existing infrastructure.

205 Thus formally in the ontogeny of the seed plants, there are two situations of recreating the  
206 photosynthetic system, which are similar at least morphologically at a model situation of emergence of  
207 proto-plant. In both uses the same elements that are in one of two states – leucoplasts and chloroplasts,  
208 and presumably similar technologies switching them from one state to another. Evolution following the  
209 principle of «Occam's Razor» not produces superfluous entities.

210 Apparently, in connection with the presented model it would be advisable conducting experimental  
211 studies and model analysis of placement and transformation leucoplasts and chloroplasts in embryos  
212 and plantlets of wild and related mutants of *Arabidopsis* in the early embryogenesis and germination  
213 using fluorescence confocal microscopy [20].

## 214 REFERENCES

- 215 1. Galitskii V.V. Dynamics of the Distribution of Free-Growing Tree Biomass with Respect to  
216 Height: Model Analysis. *Doklady Biological Sciences*. 2006. V. 407. # 4. P. 166-168. doi:  
217 10.1134/S0012496606020153).
- 218 2. Galitskii V.V. The sectional structure of a tree. Model analysis of the vertical biomass  
219 distribution. *J. General Biology*. (*Zhurnal Obshchei Biologii*). 2010. **71**(1): 19-29. (Russian).



- 220 3. Galitskii V.V. Models of tree and trees' community dynamics: evolution from 2D to 3D models.  
221 *Math. Biol. and Bioinform.* 2012. **7**(1): 54-80. (Russian).  
222 [http://www.matbio.org/2012/Galitskii2012\(7\\_54\).pdf](http://www.matbio.org/2012/Galitskii2012(7_54).pdf)
- 223 4. Galitskii V.V. Sectional model of non-free tree growth. *Comp. Res. and Modelling.* 2016. **8**(2):  
224 307-322. (Russian). [http://crm.ics.org.ru/uploads/crmissues/crm\\_2016\\_2/16.08.09.pdf](http://crm.ics.org.ru/uploads/crmissues/crm_2016_2/16.08.09.pdf)
- 225 5. Galitskii V.V. Biomass Dynamics of Higher-Order Tree Branches: An Analysis of the Model.  
226 *Biol. Bull. Rev.* 2013. **3**(5): 412-421. doi: 10.1134/S2079086413050034
- 227 6. Tsel'niker Ju.L. The structure of spruce crown. *Russian forest science.* 1994. (4): 35-44.  
228 (Russian).
- 229 7. Kazimirov N.I. *Spruce forests of Karelia.* Leningrad: NAUKA Publ. 1971. 139 p. (Russian)
- 230 8. Kramer P.J., Kozlowski T.T. *Physiology of trees.* NY: Academic Press. 1979.
- 231 9. Treskin P.P. Regularities of morphogenesis of the crown's skeletal part of mature tree. In:  
232 *Structure and productivity of spruce forests of south taiga.* Leningrad: NAUKA Publ. 1973.  
233 222-240. (Russian).
- 234 10. Feder J. *Fractals.* NY: PLENUM PRESS. 1988.
- 235 11. Galitskii V.V. Evolutionary trajectories in the parameter space of the sectional model of green  
236 spruce crown biomass. The emergence of a "proto-plant". *J. General Biology.* (Zhurnal  
237 Obshchei Biologii). 2016. **77**(6): 409-422. (Russian).
- 238 12. Margulis L. *Symbiosis in Cell Evolution.* W.H. Freeman and Company. 1981.
- 239 13. Borisov N.M., Vorob'ev F.Ju., Gilarov A.M., Es'kov K.Ju., Zhuravlev A.Ju., Markov A.V.,  
240 Oskol'sky A.A., Petrov P.N., Shipunov A.B. *Evidencies of evolution.* Ed.: A.V. Markov. 2010.  
241 (Russian). <http://evolbiol.ru/evidence.htm>
- 242 14. Gamalei Ju.V. The nature of the trophic tract in vascular plants. *TSITOLOGIYA.* 2009. **51**(5):  
243 375-387. (Russian)
- 244 15. Hanson M.R., Kohler R.H. A Novel View of Chloroplast Structure. *Plant physiology online.*  
245 2006. <http://6e.plantphys.net/essay07.01.html>
- 246 16. Malachov V.V, Great symbiosis: origin of eukaryotic cell. *V mire nauki.* 2004. (2): 70-79.  
247 (Russian).
- 248 17. Zhukova G.Ja. *Embryo plastids of flowering plants.* Doct. thesis, Botanical Inst. RAS, SPb. 1992.  
249 (Russian).

- 250 18. Serebrjakova T.I., Voronin N.S., Elenevski A.G., Batygina T.B., Shorina R.I., Savinych N.P.  
251 *Botany with fundamentals phytocenology: Anatomy and morphology of plants*. 2006. 543 p.  
252 (Russian).
- 253 19. Tejos R.I., Mercado A.V., Meisel L.A. Analysis of chlorophyll fluorescence reveals stage specific  
254 patterns of chloroplast-containing cells during Arabidopsis embryogenesis. *Biol. Res.* 2010.  
255 **43**: 99-111. doi: 10.4067/S0716-97602010000100012.
- 256 20. Allorent G., Courtois F., Chevalier F., Lerbs-Mache S. Plastid gene expression during chloroplast  
257 differentiation and dedifferentiation into non-photosynthetic plastids during seed formation.  
258 *Plant Mol Biol.* 2013. **82**: 59-70. doi: 10.1007/s11103-013-0037-0.
- 259 21. Nakajima S., Ito H., Tanaka R., Tanaka A. Chlorophyll b Reductase Plays an Essential Role in  
260 Maturation and Storability of Arabidopsis Seeds. *Plant Physiology.* 2012. **160**: 261-273. doi:  
261 10.1104/pp.112.196881.
- 262 22. Smolikova G.N., Medvedev S.S. Photosynthesis in the seeds of chloroembryophytes. Russian  
263 Plant Physiology. 2016. **63**(1): 1-12. doi: 10.1134/S1021443715060163)
- 264
